# Supplementary material for: 11B-NMR shielding effects in theclosoborane series: sensitivity of shifts and their additivity
Source: Royal Society of Chemistry journal article supplement (doi:10.1039/c7nj02689g), 2017-01-01
Supplement: c7nj02689g1.pdf [file c7nj02689g1.pdf]

## Electronic Supplementary Information

### New Journal of Chemistry

#### <sup>11</sup>B-NMR Shielding Effects in the *closo* Borane Series. Sensitivity of Shifts and their Additivity

Bohumil Štíbr

*Institute of Inorganic Chemistry, Academy of Sciences of the Czech Republic, 250 68 Řež, Czech Republic*

$\alpha(^{13}\text{C})$ -Shifts for 1-halosubstituted *n*-pentanes<sup>1</sup> (universal  $\alpha_{\text{ref}}$  scale)

F- 70.1 Cl- 30.6 Br- 19.3 I- -7.4

**Table S1.** <sup>11</sup>B-NMR data for haloderivatives of the [*closo*-B<sub>6</sub>H<sub>6</sub>]<sup>2-</sup> dianion

| compound                                                                | $\delta(^{11}\text{B})$ | multiplicity | $\Delta\delta$ | assignment |
|-------------------------------------------------------------------------|-------------------------|--------------|----------------|------------|
| [B <sub>6</sub> H <sub>6</sub> ] <sup>2-</sup>                          | - 13.5                  | d            | 0              | B1-6       |
| [1-Cl-B <sub>6</sub> H <sub>5</sub> ] <sup>2-</sup>                     | -1.0                    | s            | 3.1            | B1         |
|                                                                         | -14.5                   | d            | -1.0           | B2-5       |
|                                                                         | -30.4                   | d            | -16.9          | B6         |
| [1-Br-B <sub>6</sub> H <sub>5</sub> ] <sup>2-</sup>                     | -7.6                    | s            | 5.9            | B1         |
|                                                                         | -14.0                   | d            | -0.5           | B2-5       |
|                                                                         | -27.3                   | d            | -13.8          | B6         |
| [1-I-B <sub>6</sub> H <sub>5</sub> ] <sup>2-</sup>                      | -23.2                   | m            | -9.7           | B1         |
|                                                                         | -13.1                   | d            | 0.4            | B2-5       |
|                                                                         | -21.6                   | m            | -8.1           | B6         |
| [1,6-Cl <sub>2</sub> -B <sub>6</sub> H <sub>4</sub> ] <sup>2-</sup>     | -10.4                   | s            | -1.5           | B1,6       |
|                                                                         | -13.6                   | d            | -0.1           | B2-5       |
| [1,6-Br <sub>2</sub> -B <sub>6</sub> H <sub>4</sub> ] <sup>2-</sup>     | -15.0                   | s            | 3.1            | B1,6       |
|                                                                         | -12.6                   | d            | 0.9            | B2-5       |
| [1,6-I <sub>2</sub> -B <sub>6</sub> H <sub>4</sub> ] <sup>2-</sup>      | -25.2                   | s            | 11.7           | B1,6       |
|                                                                         | -13.1                   | d            | 0.4            | B2-5       |
| [1,2,4,6-Cl <sub>4</sub> -B <sub>6</sub> H <sub>2</sub> ] <sup>2-</sup> | -13.8                   | s            | -0.3           | B1,2,4,6   |
|                                                                         | -18.3                   | d            | -4.8           | B3,5       |
| [1,2,4,6-Br <sub>4</sub> -B <sub>6</sub> H <sub>2</sub> ] <sup>2-</sup> | -15.9                   | m            | -2.4           | B3,5       |
|                                                                         | -16.0                   | m            | -2.5           | B1,2,4,6   |
| [1,2,4,6-I <sub>4</sub> -B <sub>6</sub> H <sub>2</sub> ] <sup>2-</sup>  | -11.7                   | d            | 1.8            | B3,5       |
|                                                                         | -26.1                   | s            | -12.6          | B1,2,4,6   |
| [B <sub>6</sub> Cl <sub>5</sub> H] <sup>2-</sup>                        | -13.9                   | m            | -0.4           | B1         |
|                                                                         | -15.7                   | m            | -2.2           | B2-5       |
|                                                                         | -27.4                   | d            | -13.9          | B6         |
| [B <sub>6</sub> Br <sub>5</sub> H] <sup>2-</sup>                        | -15.8                   | m            | -2.3           | B1         |
|                                                                         | -17.6                   | m            | -4.1           | B2-5       |
|                                                                         | -23.4                   | m            | -9.9           | B6         |
| [B <sub>6</sub> I <sub>5</sub> H] <sup>2-</sup>                         | -15.7                   | d            | -2.2           | B6         |
|                                                                         | -22.0                   | s            | -8.5           | B1         |
|                                                                         | -25.6                   | s            | -12.1          | B2-5       |
| [B <sub>6</sub> Cl <sub>6</sub> ] <sup>2-</sup>                         | - 17.4                  | s            | -3.9           | B1-6       |
| [B <sub>6</sub> Br <sub>6</sub> ] <sup>2-</sup>                         | - 18.5                  | s            | -5.0           | B1-6       |
| [B <sub>6</sub> I <sub>6</sub> ] <sup>2-</sup>                          | - 24.7                  | s            | -11.2          | B1-6       |

Data from ref.<sup>2</sup>

**Table S2.**  $^{11}\text{B}$ -NMR data for 1-haloderivatives of the  $[\text{closo-B}_9\text{H}_9]^{2-}$  dianion

| compound                           | $\delta(^{11}\text{B})$ | multiplicity | $\Delta\delta$ | assignment |
|------------------------------------|-------------------------|--------------|----------------|------------|
| $[\text{B}_9\text{H}_9]^{2-}$      | -3.8                    | d            | 0              | B4-6       |
|                                    | -21.0                   | d            | 0              | B1-3,7-9   |
| $[\text{1-Cl-B}_9\text{H}_8]^{2-}$ | 0.9                     | d            | 4.7            | B5         |
|                                    | -5.3                    | s,d          | -1.5           | B4,6       |
|                                    | ca. -6.0                | d            | 15.0           | B1         |
|                                    | -18.0                   | d            | 3.0            | B2,3       |
|                                    | -18.5                   | d            | 3.5            | B7         |
|                                    | -23.2                   | d            | -2.2           | B8,9       |
| $[\text{1-Br-B}_9\text{H}_8]^{2-}$ | 0.6                     | d            | 4.4            | B5         |
|                                    | -5.0                    | d            | -1.2           | B4,6       |
|                                    | -9.7                    | s            | 11.3           | B1         |
|                                    | -18.0                   | d            | 3.0            | B2,3,7     |
|                                    | -22.3                   | d            | -1.3           | B8,9       |
| $[\text{1-I-B}_9\text{H}_8]^{2-}$  | 0.1                     | d            | 3.9            | B5         |
|                                    | -3.8                    | d            | 0.0            | B4,6       |
|                                    | -16.9                   | s            | 4.1            | B1         |
|                                    | -18.5                   | d            | 2.5            | B8,9       |
|                                    | -21.0                   | d            | 0.0            | B2,3,7     |

Data from ref. 3

**Table S3.**  $^{11}\text{B}$ -NMR data for haloderivatives of the  $[\text{closo-B}_{10}\text{H}_{10}]^{2-}$  dianion

| compound                              | $\delta(^{11}\text{B})$ | multiplicity | $\Delta\delta$ | assignment     |
|---------------------------------------|-------------------------|--------------|----------------|----------------|
| $[\text{B}_{10}\text{H}_{10}]^{2-}$   | -0.7                    | d            | 0              | B1,10          |
|                                       | -28.7                   | d            | 0              | B2-9           |
| $[\text{2-Cl-B}_{10}\text{H}_9]^{2-}$ | -2.0                    | d            | -1.3           | B1,10          |
|                                       | -9.2                    | s            | 19.5           | B2             |
|                                       | -24.4                   | m            | 4.3            | B3,5/6,9       |
|                                       | -27.6                   | d            | 1.1            | B7,8           |
|                                       | -30.8                   | d            | -2.1           | B4             |
| $[\text{2-Br-B}_{10}\text{H}_9]^{2-}$ | -1.6                    | d            | -0.9           | B1,10          |
|                                       | -13.2                   | s            | 15.5           | B2             |
|                                       | -25.6                   | d            | 3.1            | B3,5/6,9       |
|                                       | -27.6                   | d            | 1.1            | B3,5/6,9       |
|                                       | -27.3                   | d            | 1.4            | B7,8           |
|                                       | -30.1                   | d            | -1.4           | B4             |
| $[\text{2-I-B}_{10}\text{H}_9]^{2-}$  | -0.6                    | d            | 0.1            | B1,10          |
|                                       | -25.6                   | m            | 3.1            | B3,5/6,9/2/7,8 |
|                                       | -26.5                   | m            | 2.2            | B3,5/6,9/2/7,8 |
|                                       | -28.8                   | m            | -0.1           | B4             |
| $[\text{1-I-B}_{10}\text{H}_9]^{2-}$  | 0.0                     | d            | 0.7            | B10            |
|                                       | -8.9                    | s            | 8.2            | B1             |
|                                       | -25.2                   | d            | 3.5            | B2-5           |
|                                       | -28.8                   | d            | -0.1           | B6-9           |

Data from ref.<sup>4</sup>

**Table S4.**  $^{11}\text{B}$ -NMR data for haloderivatives of the  $[\text{closo-B}_{12}\text{H}_{12}]^{2-}$  dianion

| compound                                            | $\delta(^{11}\text{B})$ | multiplicity | $\Delta\delta$ | assignment |
|-----------------------------------------------------|-------------------------|--------------|----------------|------------|
| $[\text{B}_{12}\text{H}_{12}]^{2-}$                 | -15.3                   | d            | 0              | B1-12      |
| $[\text{1-F-B}_{12}\text{H}_{11}]^{2-}$             | 10.2                    | s            | 25.1           | B1         |
|                                                     | -16.7                   | d            | -1.4           | B2-6       |
|                                                     | -18.5                   | d            | -3.2           | B7-11      |
|                                                     | -24.0                   | d            | -8.7           | B12        |
| $[\text{1-Cl-B}_{12}\text{H}_{11}]^{2-}$            | -2.8                    | s            | 12.5           | B1         |
|                                                     | -14.8                   | d            | 0.5            | B2-6       |
|                                                     | -16.6                   | d            | -1.3           | B7-11      |
|                                                     | -20.2                   | d            | -4.9           | B12        |
| $[\text{1-Br-B}_{12}\text{H}_{11}]^{2-}$            | -8.2                    | s            | 7.1            | B1         |
|                                                     | -14.3                   | d            | 1.0            | B2-6       |
|                                                     | -15.9                   | d            | -0.6           | B7-11      |
|                                                     | -18.9                   | d            | -3.6           | B12        |
| $[\text{1-I-B}_{12}\text{H}_{11}]^{2-}$             | -21.3                   | s            | -6.0           | B1         |
|                                                     | -13.7                   | d            | 1.6            | B2-6       |
|                                                     | -15.2                   | d            | 0.1            | B7-11      |
|                                                     | -16.9                   | d            | -1.6           | B12        |
| $[\text{1,2-Cl}_2\text{-B}_{12}\text{H}_{10}]^{2-}$ | -2.3                    | s            | -3.7           | B1,2       |
|                                                     | -14.3                   | d            | -13.8          | B3,6       |
|                                                     | -16.1                   | d            | -15.3          | B4,5,7,11  |
|                                                     | -17.9                   | d            | -18.1          | B8,10      |
|                                                     | -21.5                   | d            | -20.1          | B9,12      |
| $[\text{1,2-Br}_2\text{-B}_{12}\text{H}_{10}]^{2-}$ | -7.2                    | s            | -8.9           | B1,2       |
|                                                     | -13.3                   | d            | -13.3          | B3,6       |
|                                                     | -14.9                   | d            | -14.7          | B4,5,7,11  |
|                                                     | -16.5                   | d            | -16.9          | B8,10      |
|                                                     | -19.5                   | d            | -18.7          | B9,12      |
| $[\text{1,2-I}_2\text{-B}_{12}\text{H}_{10}]^{2-}$  | -19.7                   | s            | -20.8          | B1,2       |
|                                                     | -12.1                   | d            | -11.9          | B3,6       |
|                                                     | -13.6                   | d            | -13.6          | B4,5,7,11  |
|                                                     | -15.1                   | d            | -15.0          | B8,10      |
|                                                     | -16.8                   | d            | -16.3          | B9,12      |
| $[\text{1,7-F}_2\text{-B}_{12}\text{H}_{10}]^{2-}$  | 7.0                     | s            | 6.6            | B1,7       |
|                                                     | -18.1                   | d            | -18.1          | B2,3       |
|                                                     | -19.9                   | d            | -19.5          | B4,6,8,11  |
|                                                     | -21.7                   | d            | -21.7          | B9,10      |
|                                                     | -25.4                   | d            | -25.4          | B5,12      |
| $[\text{1,7-Cl}_2\text{-B}_{12}\text{H}_{10}]^{2-}$ | -4.1                    | s            | -3.7           | B1,7       |
|                                                     | -14.3                   | d            | -13.8          | B2,3       |
|                                                     | -16.1                   | d            | -15.4          | B4,6,8,11  |
|                                                     | -17.9                   | d            | -17.5          | B9,10      |
|                                                     | -19.7                   | d            | -19.2          | B5,12      |
| $[\text{1,7-Br}_2\text{-B}_{12}\text{H}_{10}]^{2-}$ | -8.8                    | s            | -9.0           | B1,7       |
|                                                     | -13.3                   | d            | -13.4          | B2,3       |
|                                                     | -14.9                   | d            | -14.6          | B4,6,8,11  |
|                                                     | -16.5                   | d            | -16.2          | B9,10      |
|                                                     | -17.9                   | d            | -17.9          | B5,12      |
| $[\text{1,7-I}_2\text{-B}_{12}\text{H}_{10}]^{2-}$  | -21.2                   | s            | -21.8          | B1,7       |
|                                                     | -12.1                   | d            | -12.0          | B2,3       |
|                                                     | -13.6                   | d            | -13.3          | B4,6,8,11  |
|                                                     | -15.1                   | d            | -15.0          | B9,10      |
|                                                     | -15.3                   | d            | -15.0          | B5,12      |

Data from ref.<sup>5-7</sup>

**Table S5.** Gradient values ( $g$ ) indicating sensitivity to halogen substitution for all positions in the known series of [*closo*-X<sub>m</sub>-B<sub>n</sub>H<sub>n-m</sub>]<sup>2-</sup> derivatives

| series                                                                 | $\alpha$                         | $\beta$                                                                          | $\gamma$                                                    | A                                   |
|------------------------------------------------------------------------|----------------------------------|----------------------------------------------------------------------------------|-------------------------------------------------------------|-------------------------------------|
| [1-X-B <sub>6</sub> H <sub>5</sub> ] <sup>2-</sup>                     | <b>-57.5</b>                     | <b>9.0</b><br>B2-5                                                               | -                                                           | <b>18.0</b><br>B6                   |
| [1,6-X <sub>2</sub> -B <sub>6</sub> H <sub>4</sub> ] <sup>2-</sup>     | <b>-38.8</b><br>$\alpha+A$       | <b>0.0</b><br>$\beta-\beta$                                                      | -                                                           | -                                   |
| [1,2,4,6-X <sub>4</sub> -B <sub>6</sub> H <sub>2</sub> ] <sup>2-</sup> | <b>-31.3</b><br>$\alpha+A+\beta$ | <b>18.0</b><br>2 $\beta$                                                         | -                                                           | -                                   |
| [B <sub>6</sub> X <sub>6</sub> ] <sup>2-</sup>                         | <b>-19.0</b><br>$\alpha+4\beta$  | -                                                                                | -                                                           | -                                   |
| [1-X-B <sub>9</sub> H <sub>8</sub> ] <sup>2-</sup>                     | <b>-32.5</b>                     | <b>-10.1</b><br>B2,3,7<br><b>4.0</b><br>B4,6                                     | <b>-2.5</b><br>B5<br><b>13.5</b><br>B8,9                    | -                                   |
| [2-X-B <sub>10</sub> H <sub>9</sub> ] <sup>2-</sup>                    | <b>-41.3</b>                     | <b>-1.8, 5.4</b><br>B3,5/6,9<br><b>3.5</b><br>B1                                 | <b>3.5</b><br>B10<br><b>2.5</b><br>B7,8<br><b>5.4</b><br>B4 | -                                   |
| [1-X-B <sub>12</sub> H <sub>11</sub> ] <sup>2-</sup>                   | <b>-45.0</b>                     | <b>3.9</b><br>B2-6                                                               | <b>4.3</b><br>B7-11                                         | <b>9.2</b><br>B12                   |
| [1,2-X <sub>2</sub> -B <sub>12</sub> H <sub>10</sub> ] <sup>2-</sup>   | <b>-42.5</b><br>$\alpha+\beta$   | <b>6.3</b><br>$\beta+\beta$<br><b>7.0</b><br>$\beta+\gamma$                      | <b>7.0</b><br>$\gamma+\gamma$                               | <b>11.3</b><br>A+ $\gamma$          |
| [1,7-X <sub>2</sub> -B <sub>12</sub> H <sub>10</sub> ] <sup>2-</sup>   | <b>-43.8</b><br>$\alpha+\gamma$  | <b>7.9</b><br>B2,3<br>$\beta+\beta$<br><b>8.0</b><br>B4,6/8,11<br>$\beta+\gamma$ | <b>8.6</b><br>B9,10<br>$\gamma+\gamma$                      | <b>13.4</b><br>B5,12<br>A+ $\gamma$ |

#### ESI References

- 1 H. I. Reich, webpage: <http://www.chem.wisc.edu/areas/reich/nmr/c13-data/cdata.htm>
- 2 W. Preetz and J. Fritze, *Z. Naturforsch.*, 1987, **42b**, 287.
- 3 K. Siegburg and W. Preetz, *Inorg. Chem.*, 2000, **39**, 3280-3282.
- 4 W. Preetz and H.-G. Srebný, *Z. Naturforsch.*, 1984, **39b**, 6-13.
- 5 S. Heřmánek, *Chem. Rev.*, 1992, **92**, 325-362.
- 6 M. Lepšík, M. Srnec, D. Hnyk, B. Grüner, J. Plešek, Z. Havlas and L. Rulišek, *Collect. Czech. Chem. Commun.*, 2009, **74**, 1-27.
- 7 H.-G. Srebný, W. Preetz and H. C. Marsmann, *Z. Naturforsch.*, 1984, **39b**, 189.
